# Supplementary material for: Green synthesis of a magnesium single-atom catalyst from Spinacia oleracea chlorophyll extracts for sustainable electrocatalytic nitrate reduction to ammonia
Source: Royal Society of Chemistry journal article supplement (doi:10.1039/d4gc01422g), 2024-01-01
Supplement: d4gc01422g1.pdf [file d4gc01422g1.pdf]

Supplementary information

Total figures S1 to S37

Supplementary information **Figure S1.**

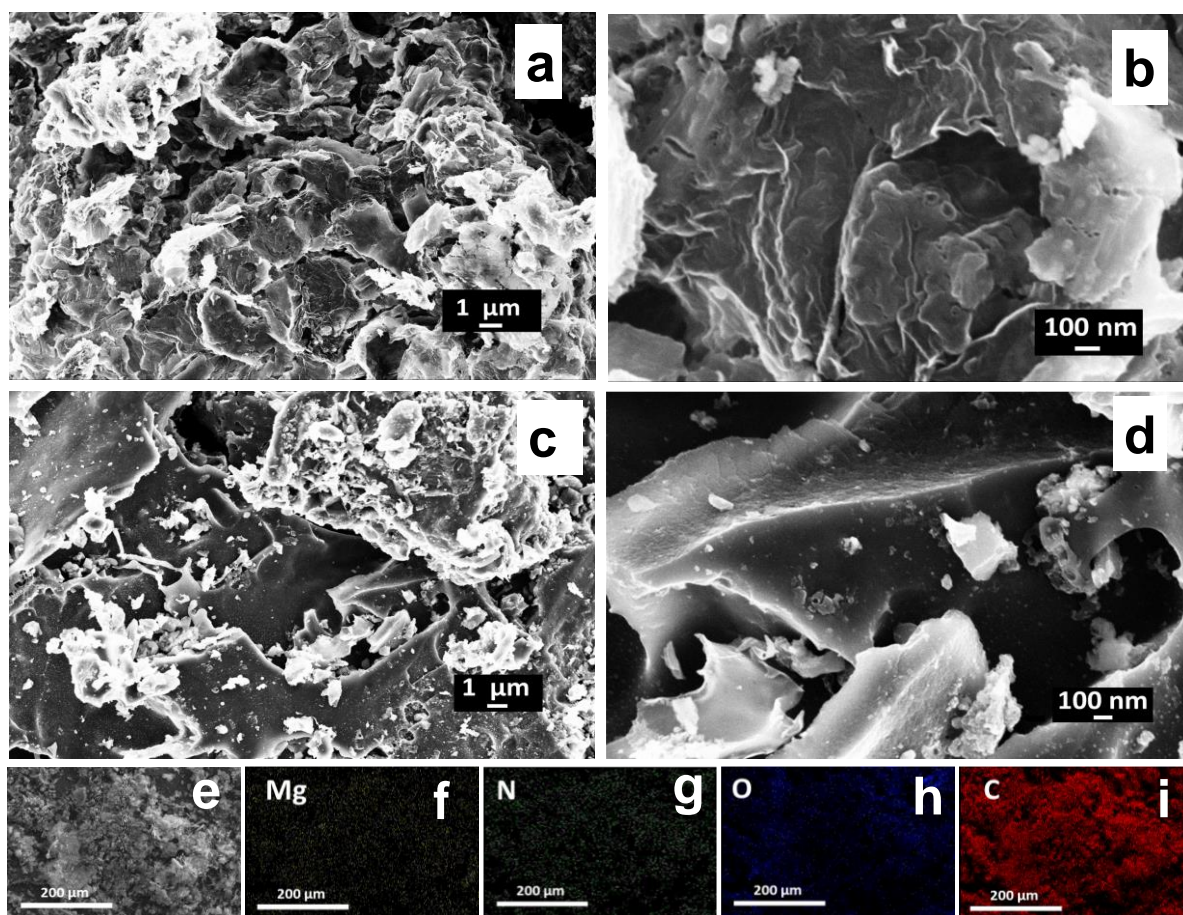

**Figure. S1.** SEM images of MgNxC650 (a-b), MgNxC850 (c-d) and different magnifications and EDS mapping of MgNxC650 with (e) Selected region, (f-i) for Mg, N, O, and C respectively.

Supplementary information **Figure S2.**

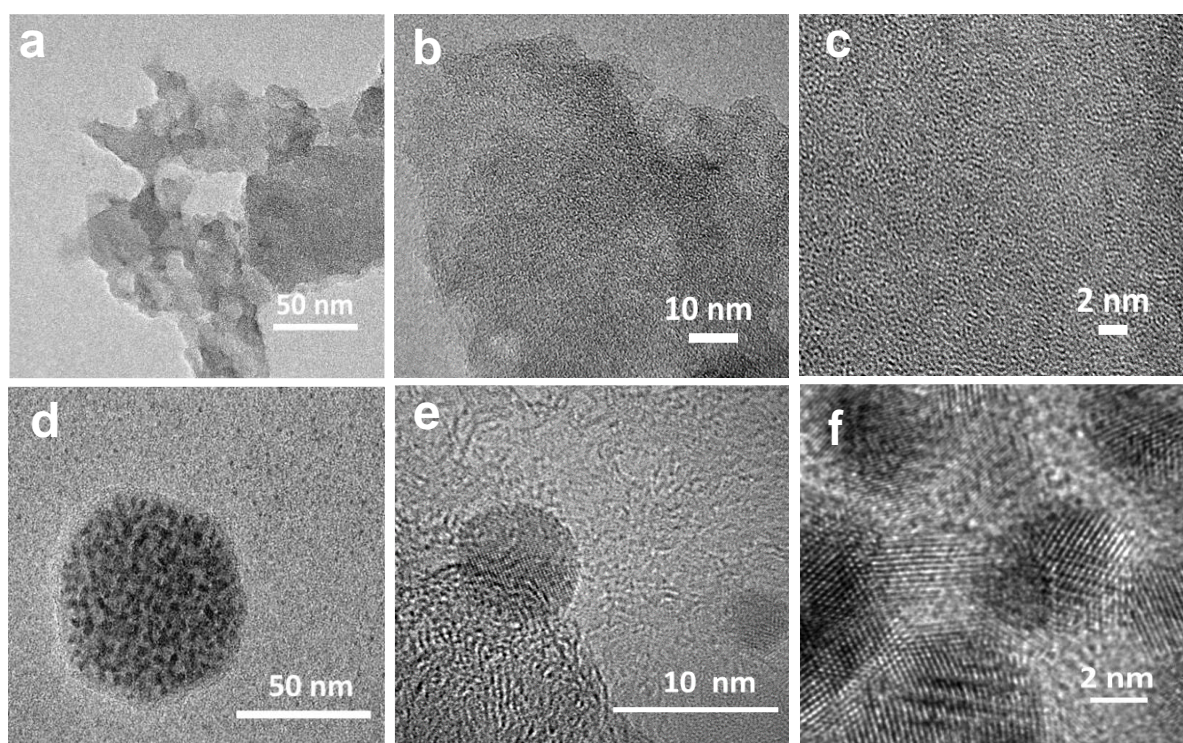

**Figure. S2.** HRTEM images at different magnifications of (a-c) MgNxC650 and (d-f) MgNxC850.

Supplementary information **Figure S3.**

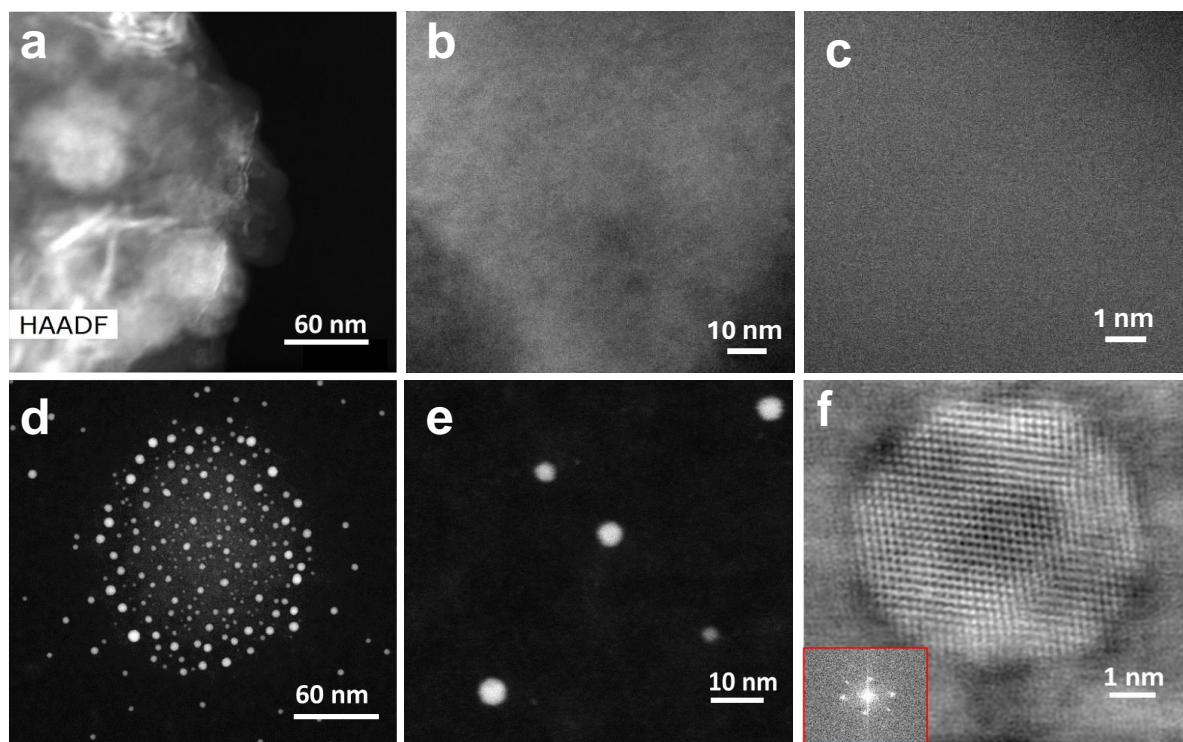

**Figure. S3.** HAADF-STEM EDS imaging of (a-c) MgNxC650, and (d-f) MgNxC850.

Supplementary information **Figure S4.**

(a)

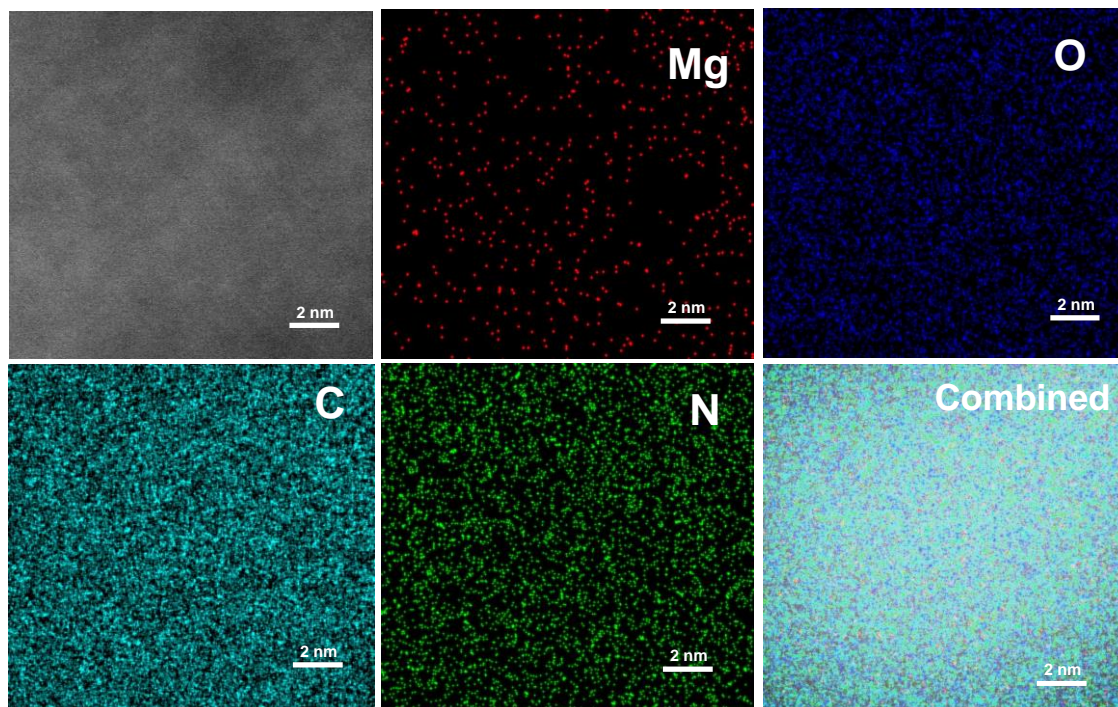

(b)

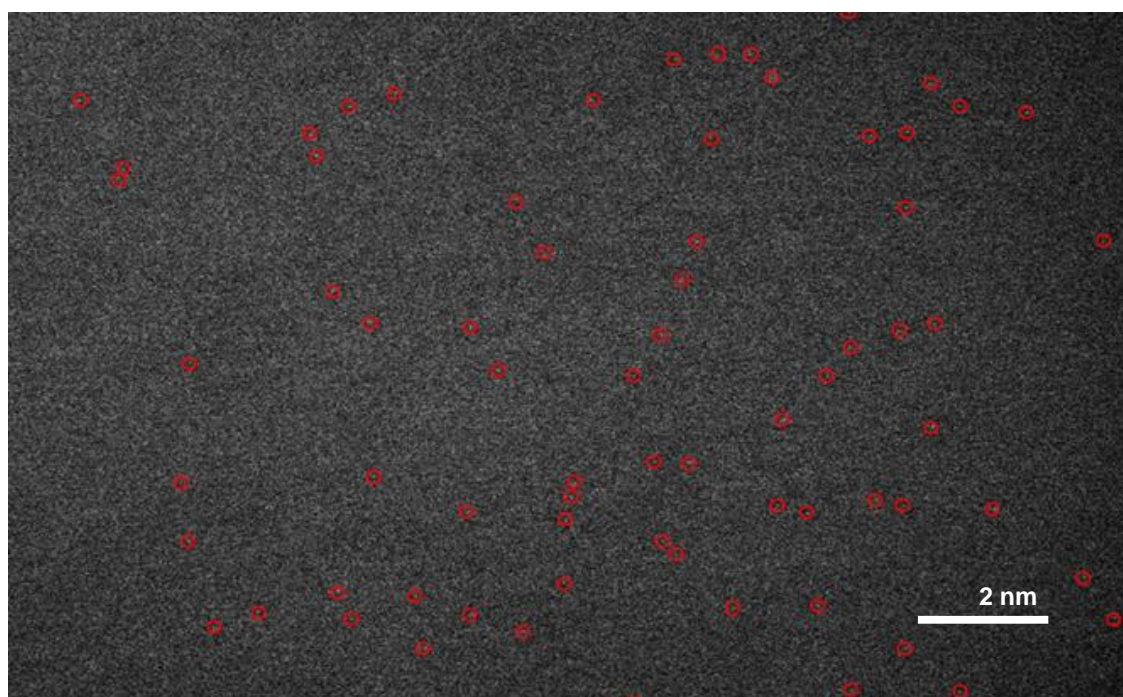

**Figure. S4.** The scale bar of 2 nm shows (a) Elemental mapping of elements and (b) atomic dispersion of magnesium atoms of MgN<sub>x</sub>C<sub>650</sub>.

Supplementary information **Figure S5.**

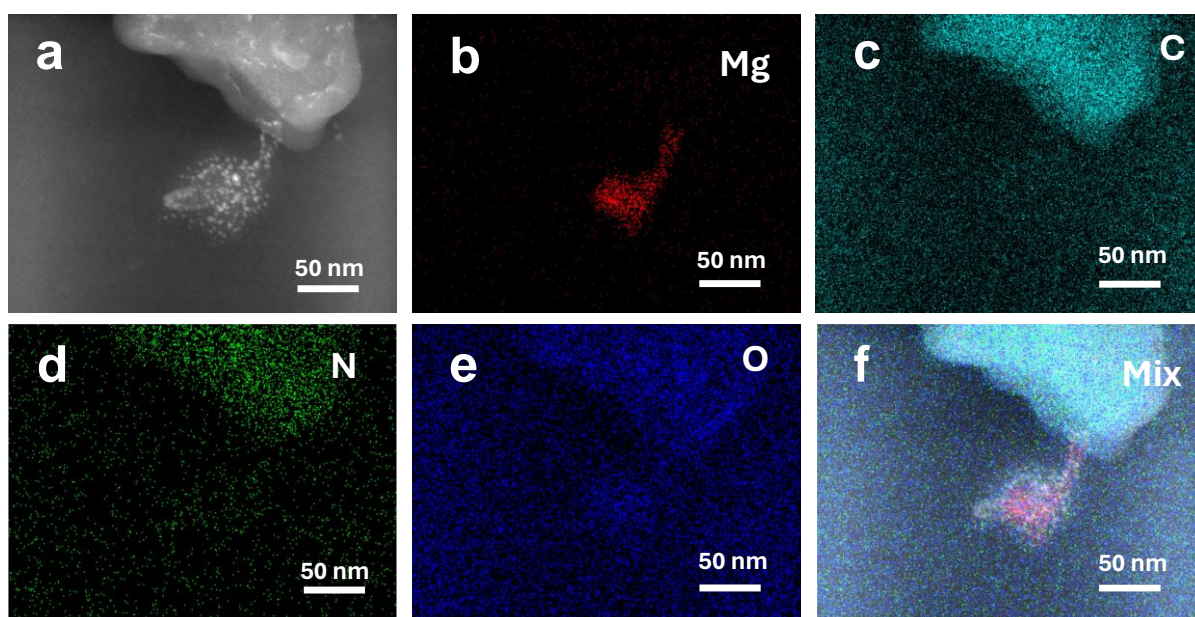

**Figure. S5.** HAADF-STEM EDS elemental mapping of MgNxC850 (a) region of interest, (b) Mg, (c) C, (d) N, (e) O, and (f) mixed depiction of the distribution of respective elements.

Supplementary information **Figure S6.**

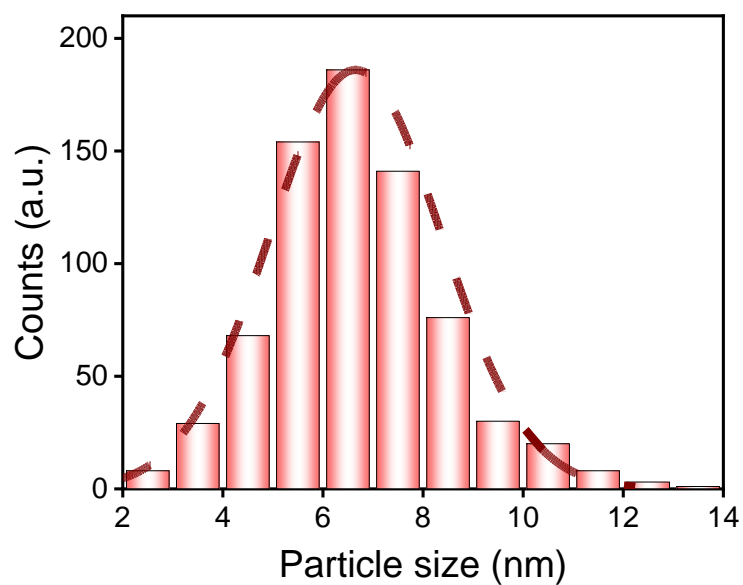

**Figure. S6.** Particle distribution of nanoparticle in MgNxC850 catalyst.

Supplementary information **Figure S7.**

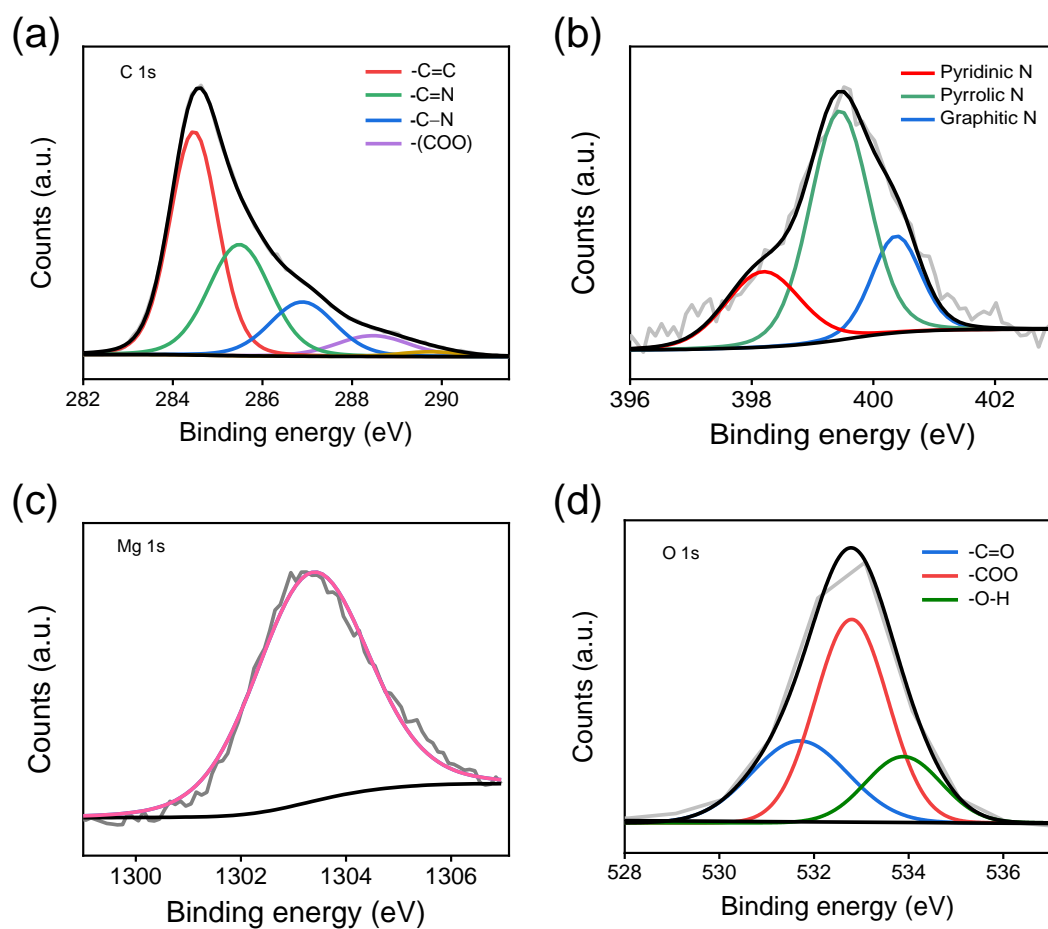

**Figure. S7.** XPS analysis of MgN<sub>x</sub>C<sub>850</sub> with (a) C 1s, (b) N 1s, (c) Mg 1s and (d) O 1s spectra.

Supplementary information **Figure S8.**

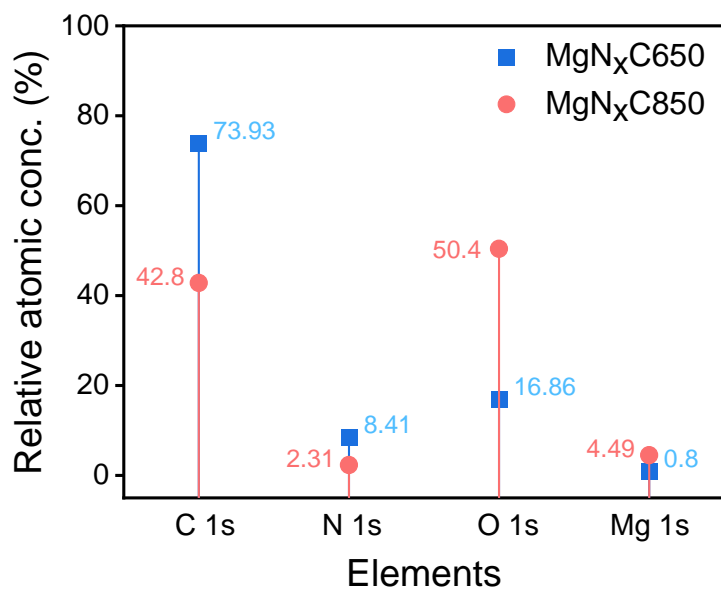

**Figure. S8.** Relative atomic concentrations (%) for MgN<sub>x</sub>C650 and MgN<sub>x</sub>C850 as respective elements.

Supplementary information **Figure S9.**

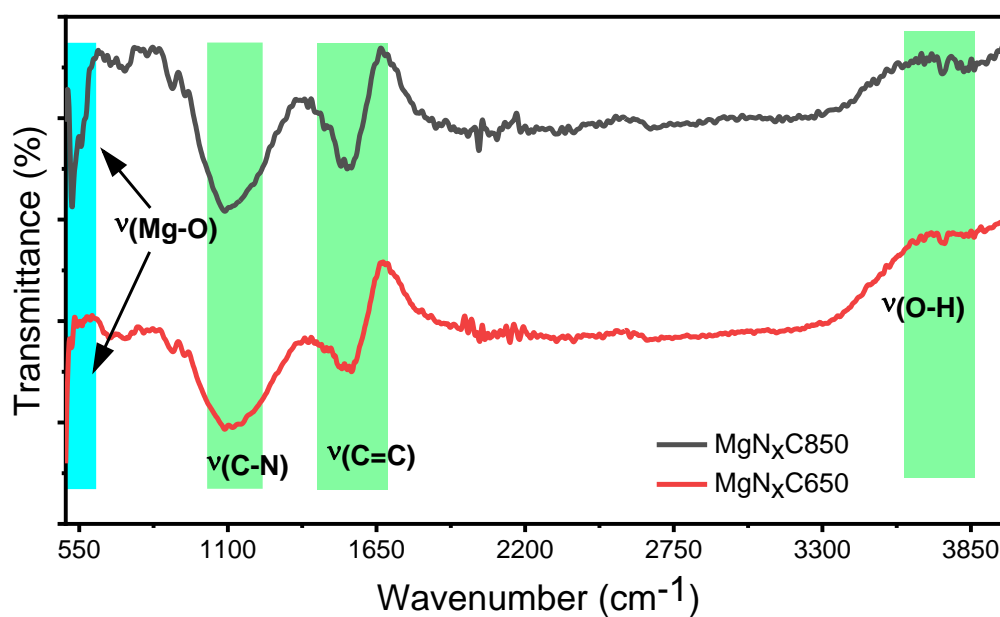

**Figure. S9.** FTIR spectrum of MgN<sub>x</sub>C650 and MgN<sub>x</sub>C850, peak at near 550 cm<sup>-1</sup> for stretching frequency of Mg-O bond.

Supplementary information **Figure S10.**

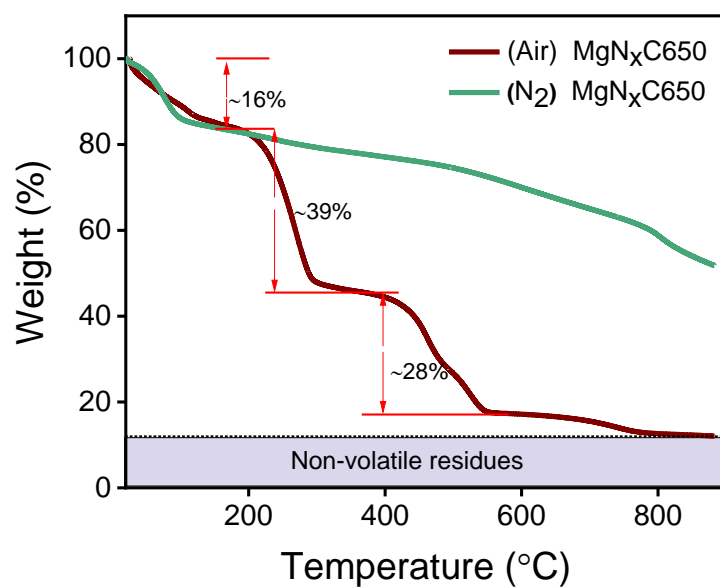

**Figure. S10.** Thermogravimetric analysis (TGA) performed in different environmental controlled media on MgN<sub>x</sub>C650.

Supplementary information **Figure S11.**

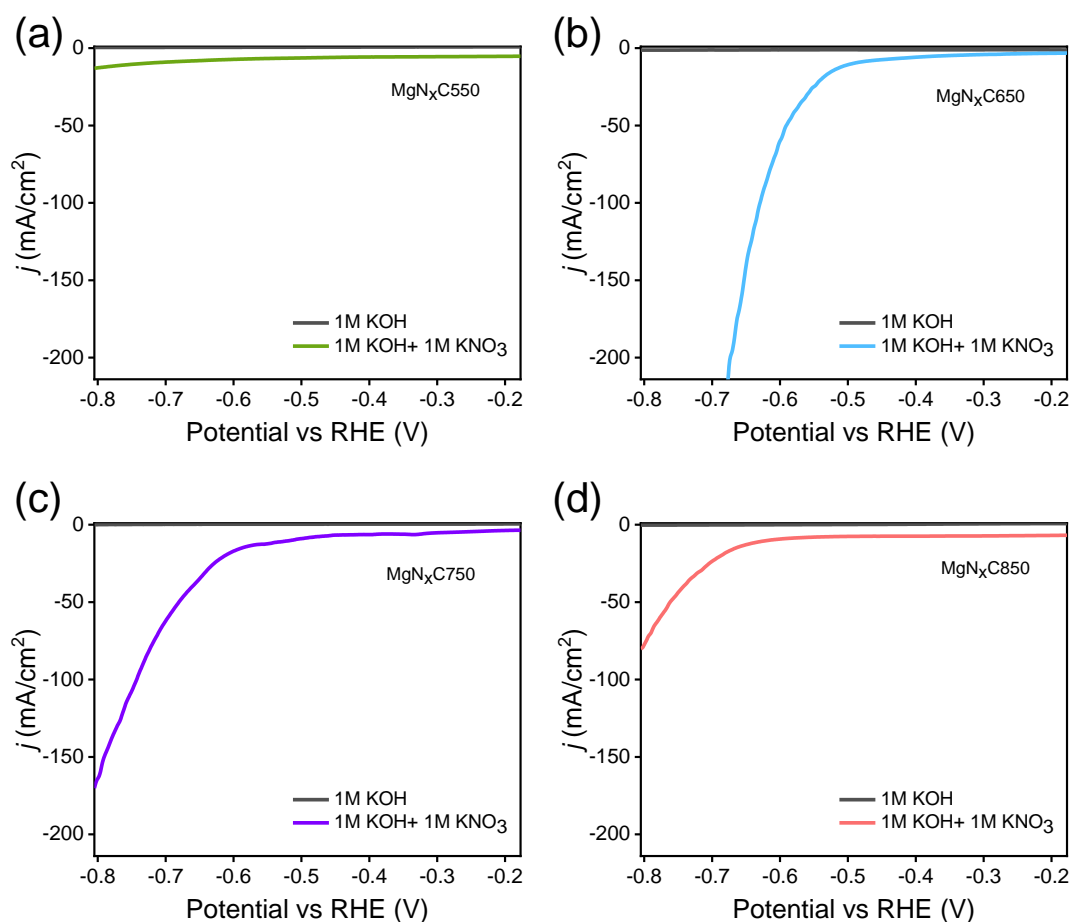

**Figure. S11.** Linear sweep voltammetry (LSV) measurements for MgN<sub>x</sub>C catalysts with and without nitrate source.

Supplementary information **Figure S12.**

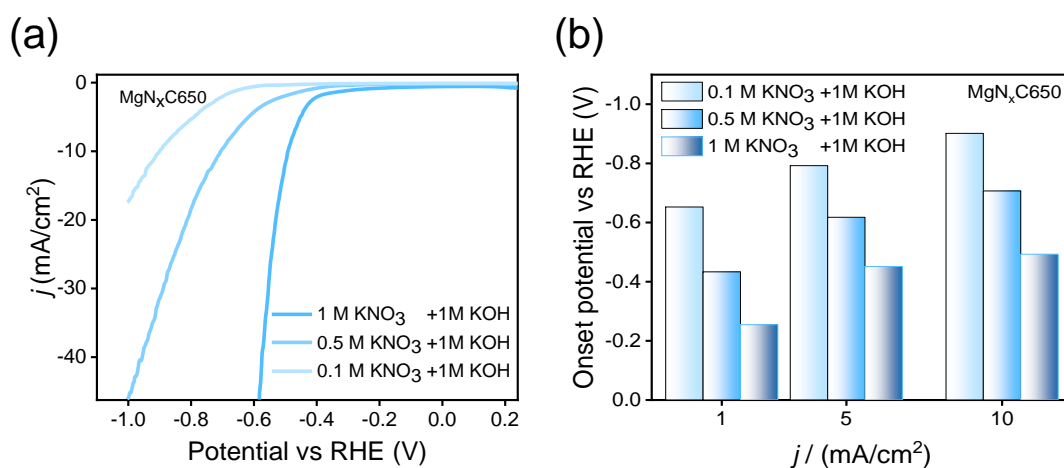

**Figure. S12.** (a) Different concentrations of nitrate source, and (b) Onset potential and overpotential vs RHE (V).



Supplementary information **Figure S13.**

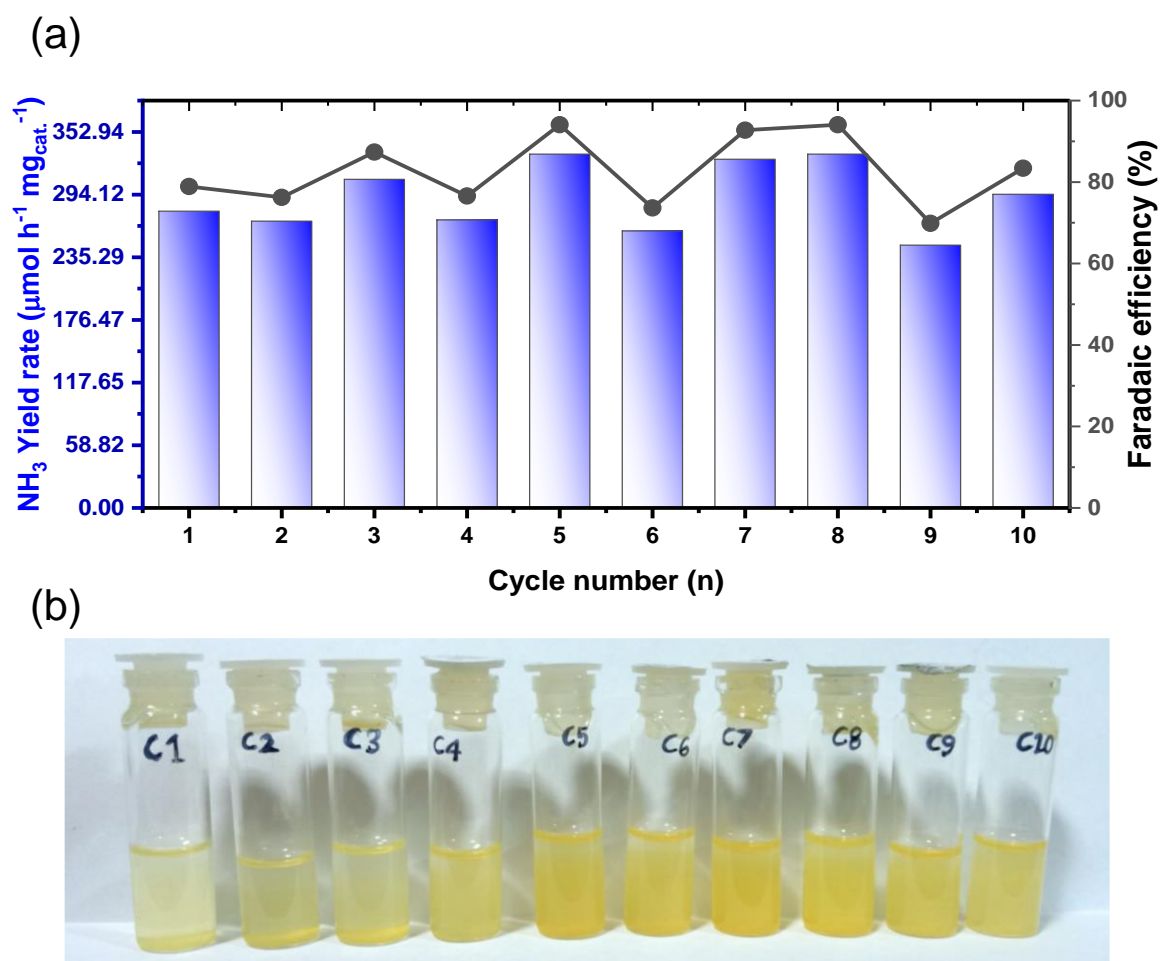

**Figure. S13.** Cyclic test performed for 30 minutes each for 5 hours showing repeatability by  $\text{MgNxC650}$  at  $-0.58$  vs RHE (V).

Supplementary information **Figure S14.**

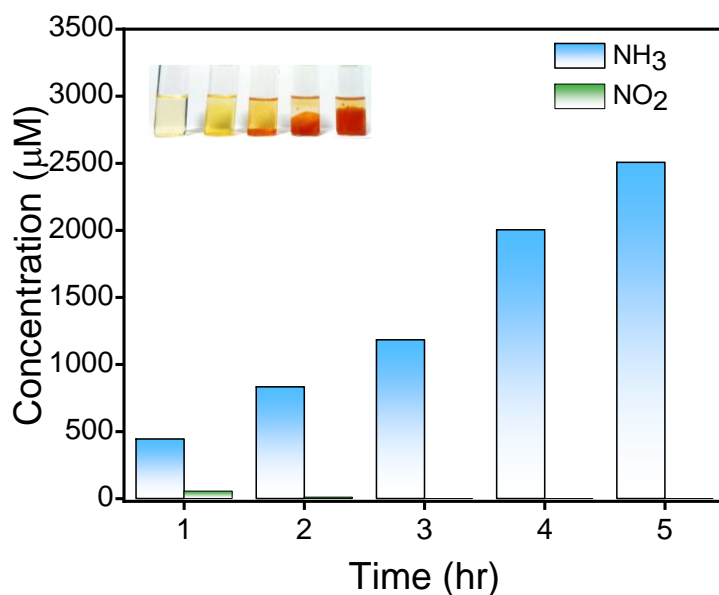

**Figure. S14.** Time-dependent studies for continuous for five hours using MgNxC650 at -0.58 vs RHE (V) toward ammonia production.

Supplementary information **Figure S15.**

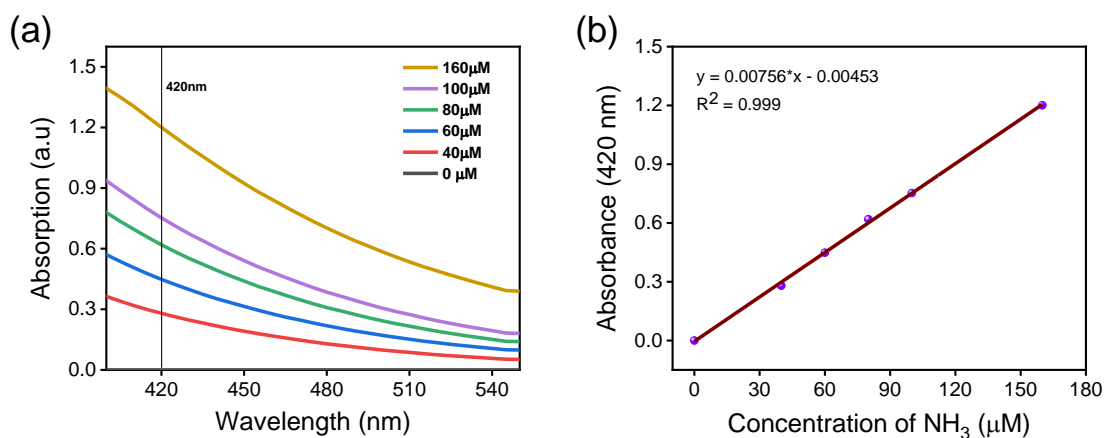

**Figure. S15.** (a) UV-Visible spectrum and (b) Calibration curve plot for estimation of NH<sub>4</sub><sup>+</sup> ion.

Supplementary information **Figure S16.**

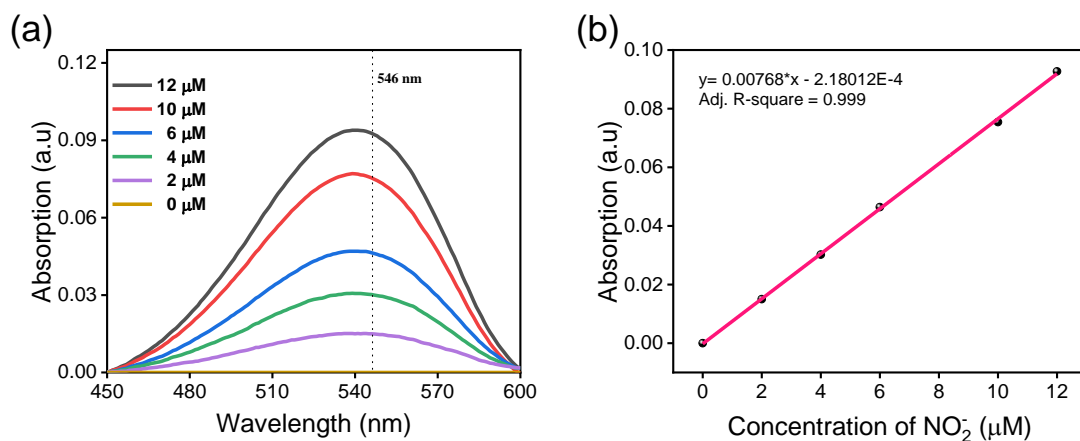

**Figure. S16.** (a) UV-Visible spectrum and (b) Calibration curve plot for the estimation of  $\text{NO}_2^-$  ion.

Supplementary information **Figure S17.**

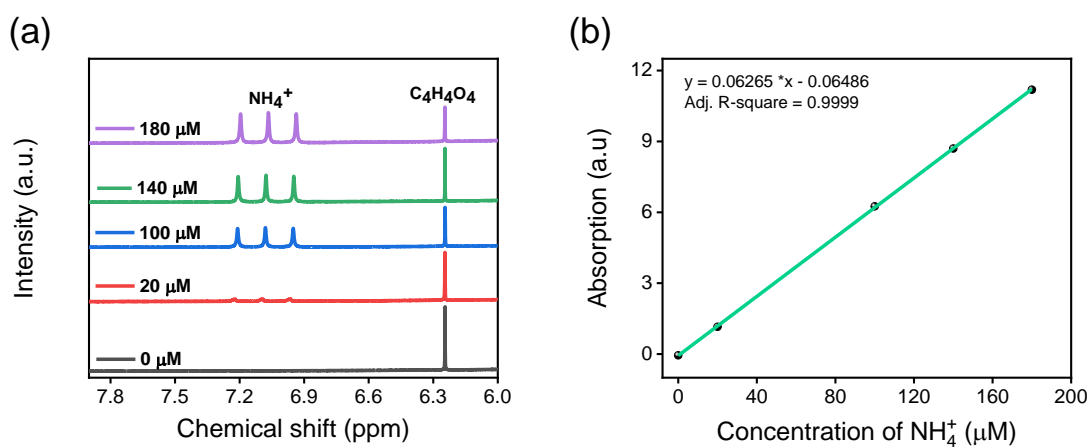

**Figure. S17.** (a) NMR response at different  $\text{NH}_4^+$  concentrations and (b) Calibration curve plot for the estimation of  $\text{NH}_4^+$  ion using NMR spectroscopy.

Supplementary information **Figure S18.**

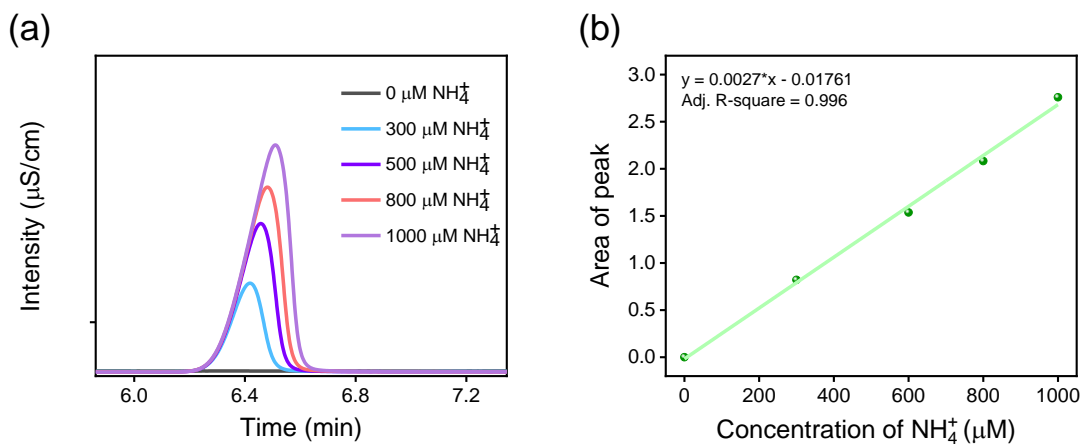

**Figure. S18.** (a) Ion-exchange chromatograms, and (b) Calibration curve plot for the estimation of  $\text{NH}_4^+$  ion.

Supplementary information **Figure S19.**

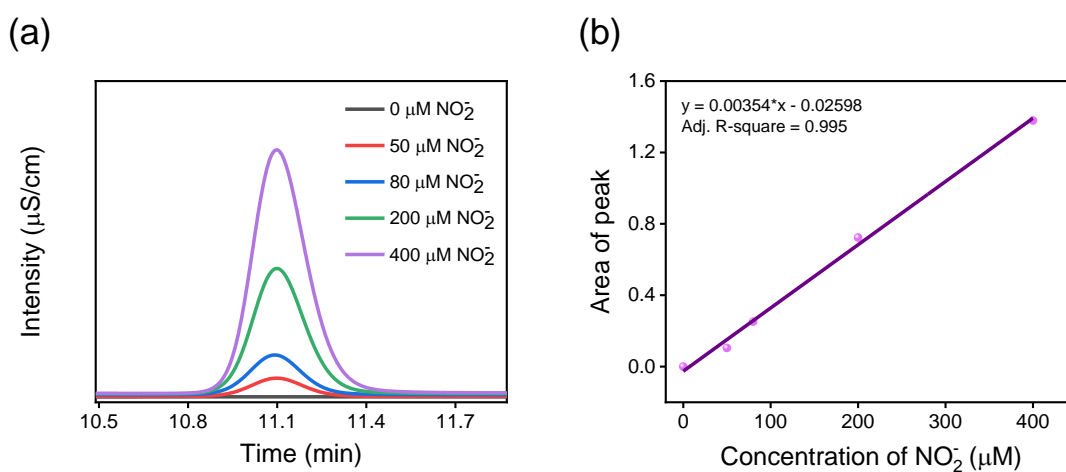

**Figure. S19.** (a) Ion-exchange chromatograms, and (b) Calibration curve plot for the estimation of  $\text{NO}_2^-$  ion.

Supplementary information **Figure S20.**

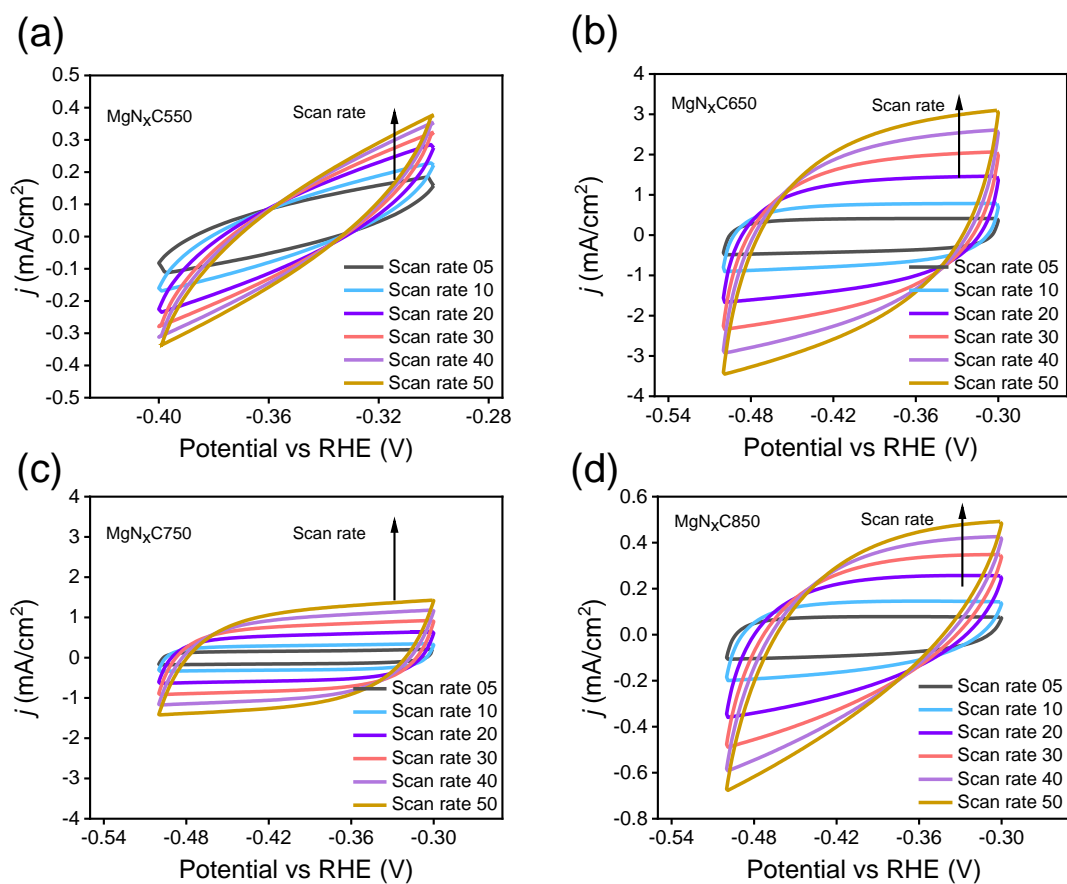

**Figure. S20.** Cyclic voltammetry curve signature of (a)  $\text{MgN}_x\text{C}550$ , (b)  $\text{MgN}_x\text{C}650$ , (c)  $\text{MgN}_x\text{C}750$  and (d)  $\text{MgN}_x\text{C}850$ .

Supplementary information **Figure S21.**

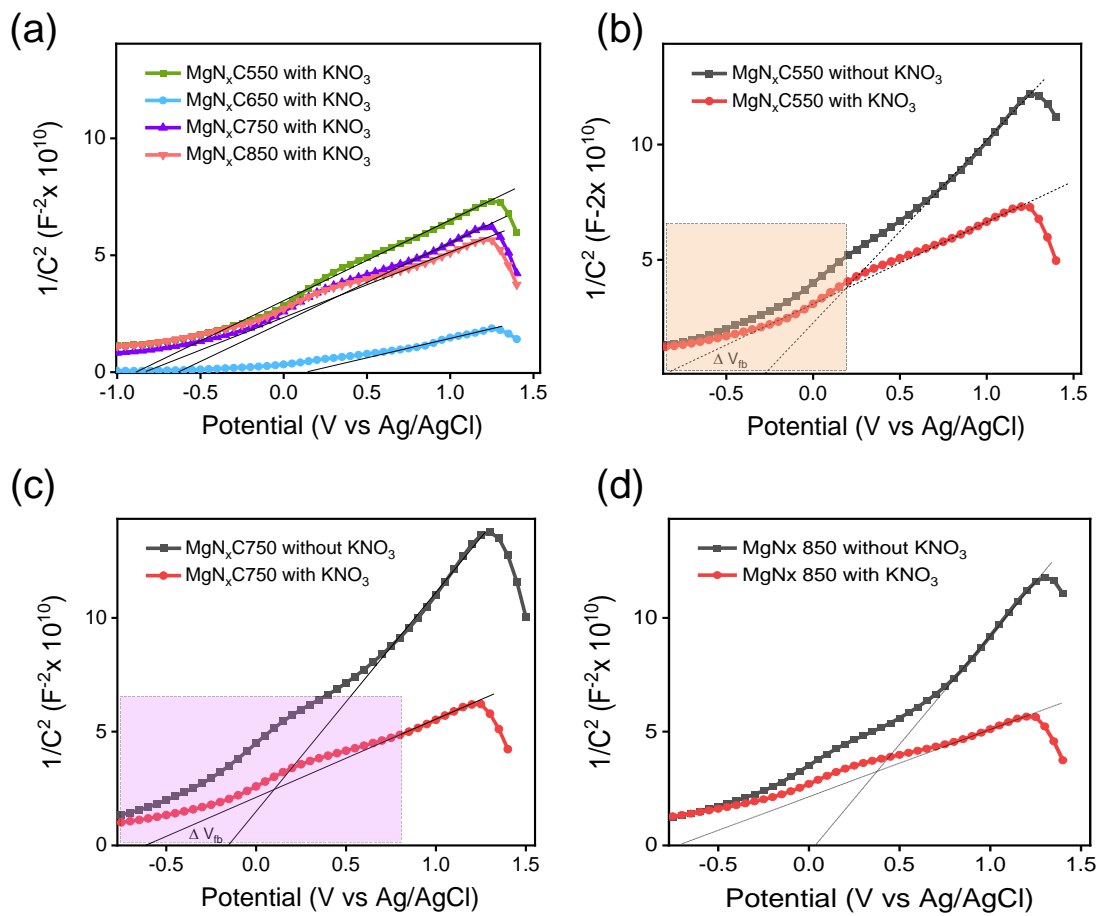

**Figure. S21.** (a) Mott-Schottky (M-S) plots of MgN<sub>x</sub>C samples after introducing 1M KNO<sub>3</sub> in 1M KOH electrolyte medium. (b) comparison of deviation in the M-S plot before and after the addition of KNO<sub>3</sub> on MgN<sub>x</sub>C550, (c) MgN<sub>x</sub>C750, and (d) MgN<sub>x</sub>C850.

Supplementary information **Figure S22.**

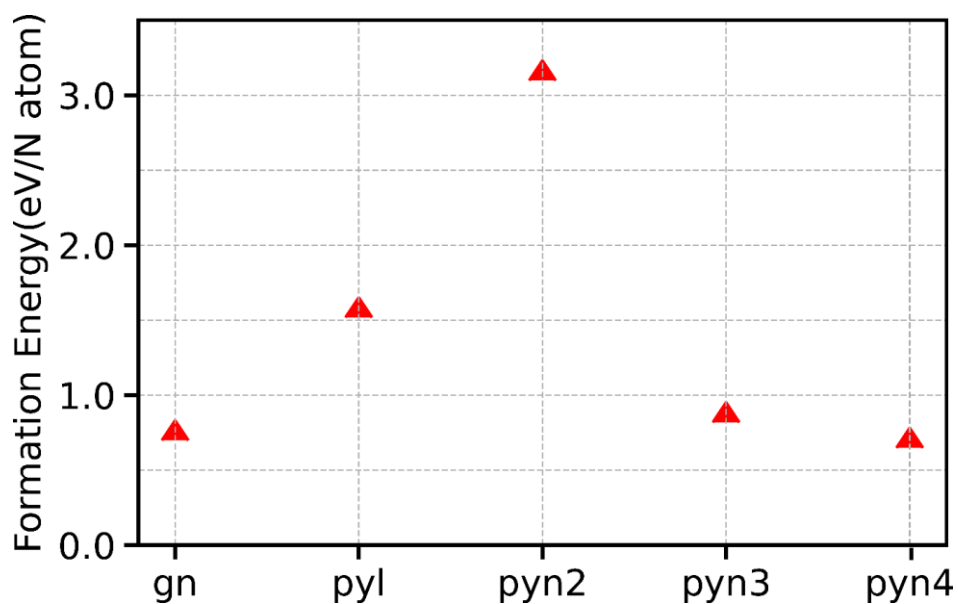

**Figure. S22.** Formation energies of N-doped structures showing g-N, pyridinic-3 (pyn3) and pyridinic-4 (pyn4) are relatively more stable than pyrrolic and pyridinic-2 (pyn2).

Supplementary information **Figure S23.**

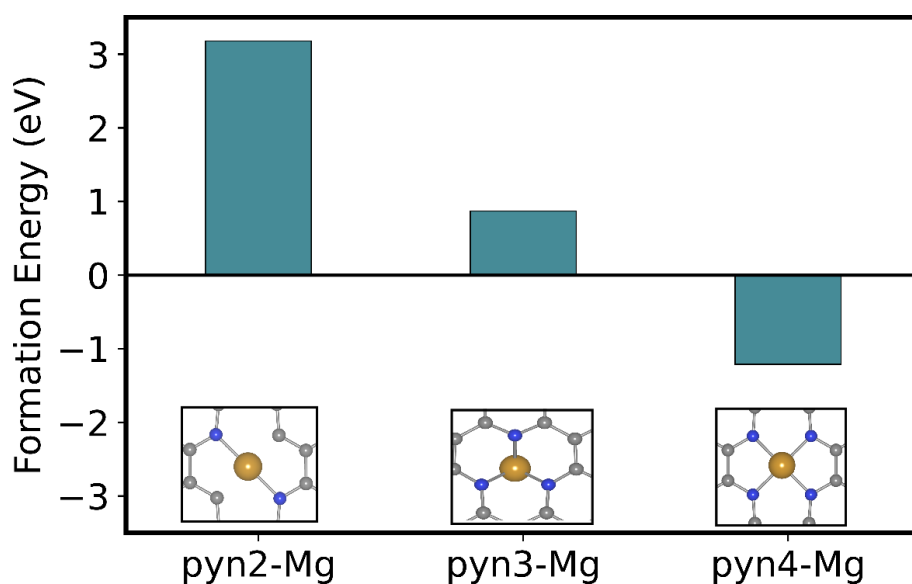

**Figure. S23.** Formation energy of Mg-SAC with Mg coordinated to two, three and four N atoms. Tetracoordinated Mg atoms are most stable forming the Mg-SAC substrate.

Supplementary information **Figure S24.**

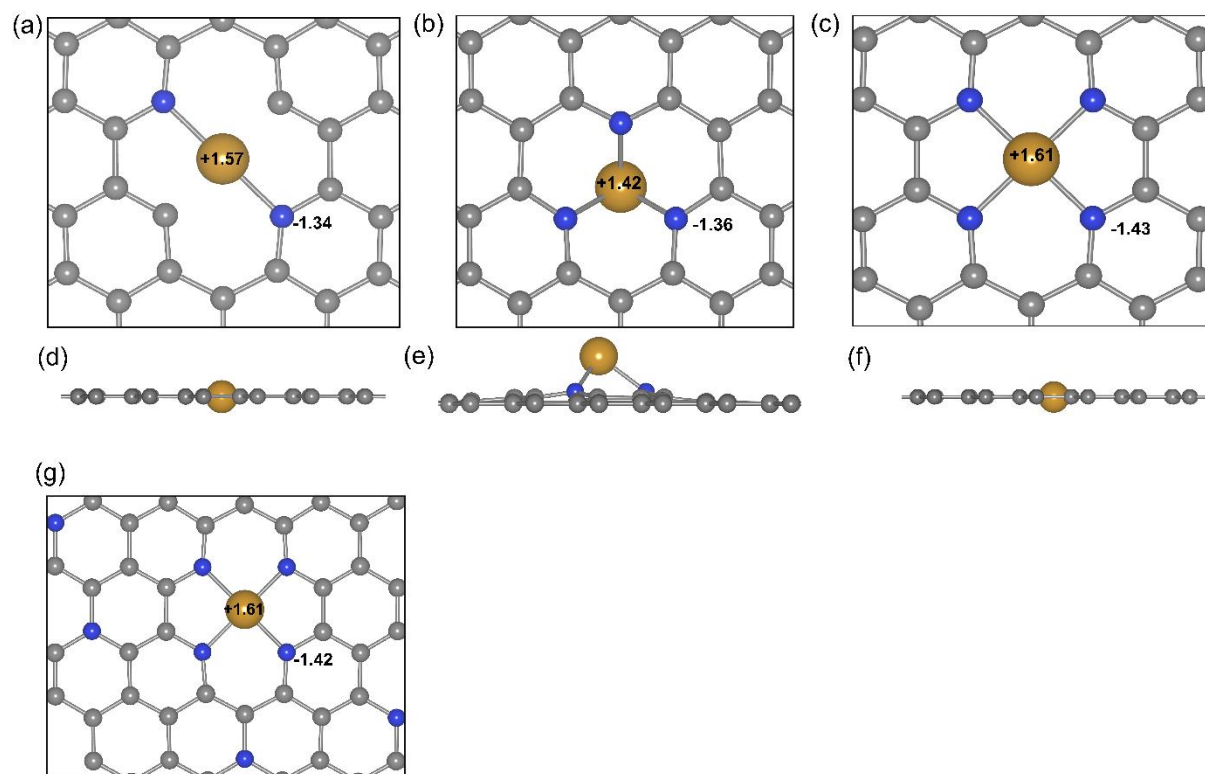

**Figure. S24. Bad Figure. S24.** Bader charge distributions of Mg and N atoms in the substrate. In plane Mg atoms in (a) pyn2 and (c) pyn4 show better charge transfer between Mg and N atoms. For (b) pyn3, Mg atom moves out of the plane, and (g) the final substrate structure.



Supplementary information **Figure S25.**

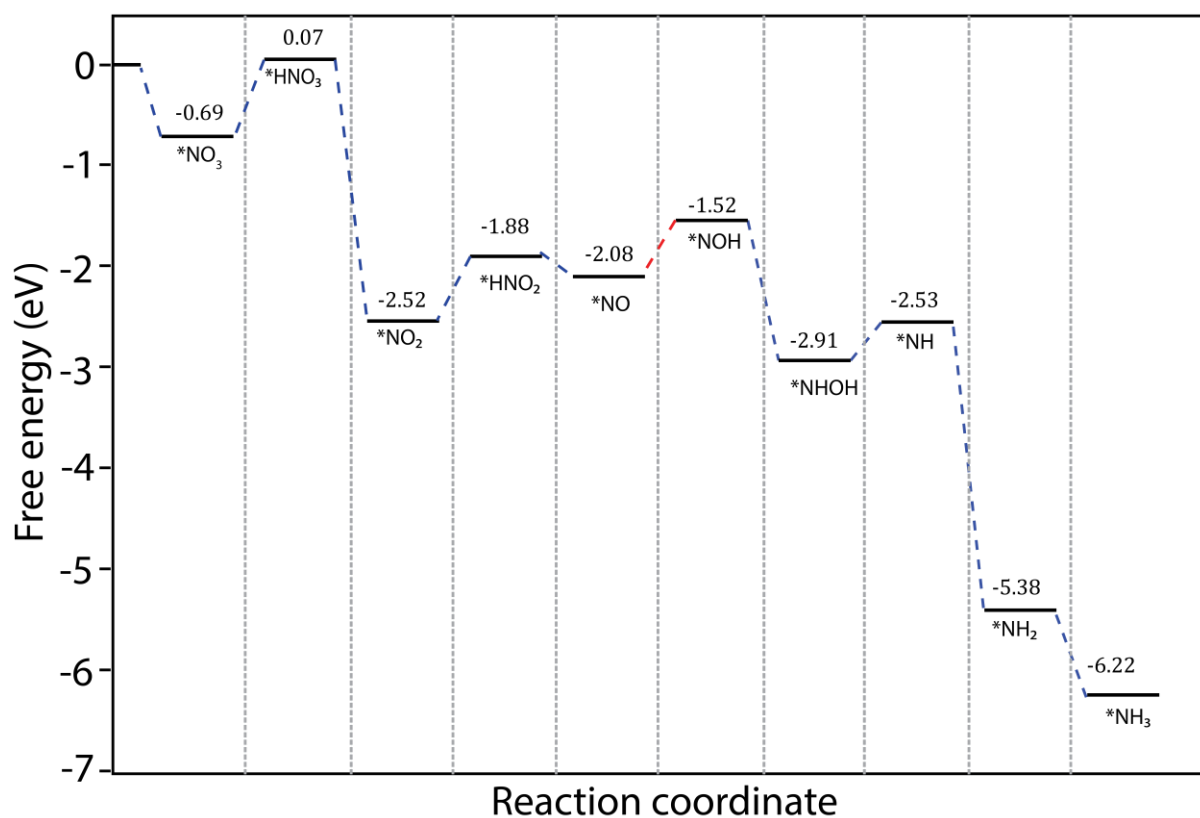

**Figure. S25.** Calculated free energy diagram for the NRA2 where, on \*NO, hydrogenation takes place on oxygen atom. This step is thermodynamically uphill.

Supplementary information **Figure S26.**

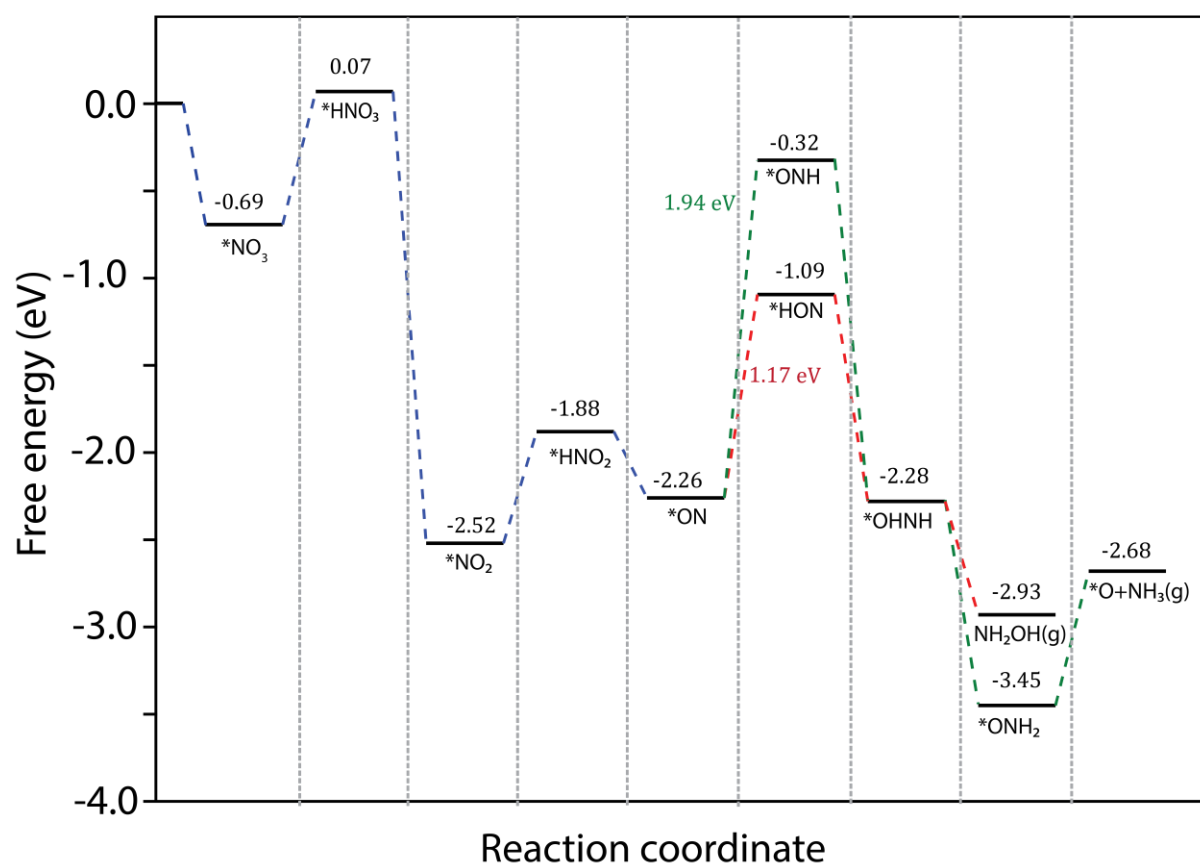

**Figure. S26.** Calculated free energy diagram for the NRA3 where, on \*ON, hydrogenation takes place on O and N, leading to \*HON and \*ONH with thermodynamic potential barriers of 1.17 and 1.94 eV respectively.

Supplementary information **Figure S27.**

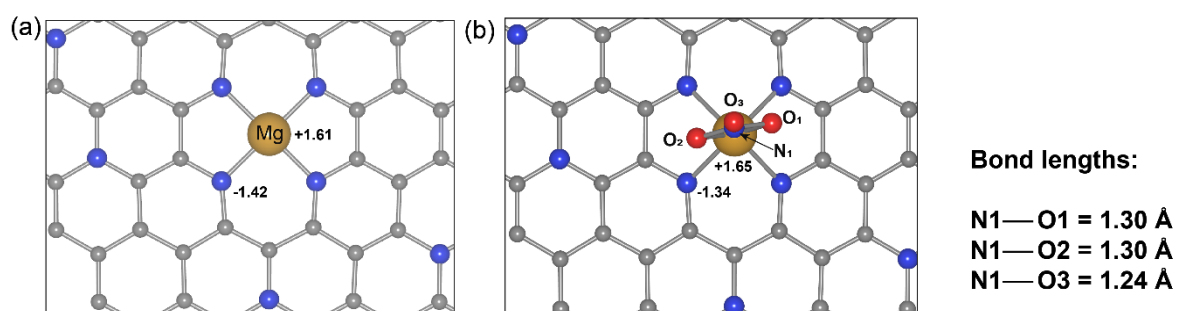

**Figure. S27.** Charge distribution on the substrate (a) before and (b) after adsorption of \*NO<sub>3</sub> and the elongation of N-O bonds after \*NO<sub>3</sub> adsorption.

Supplementary information **Figure S28.**

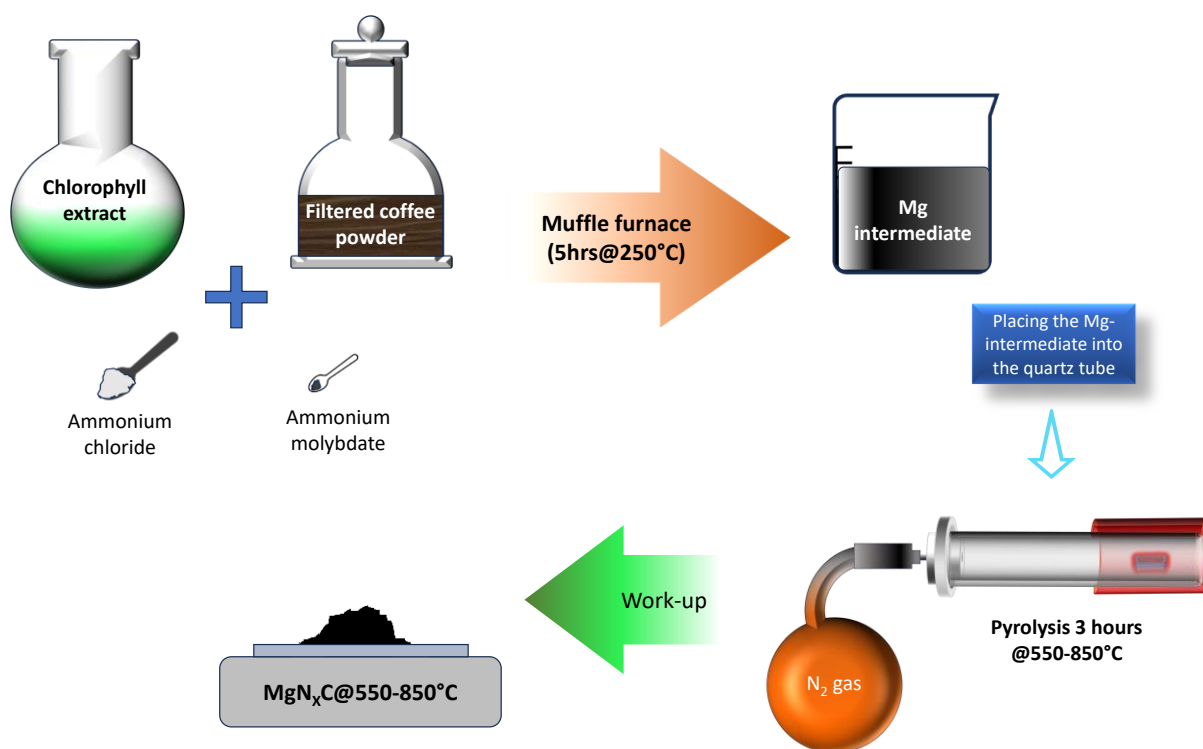

**Figure. S28.** Schematic diagram of Synthetic procedure of MgN<sub>x</sub>C catalyst at different temperatures.

Supplementary information **Figure S29.**

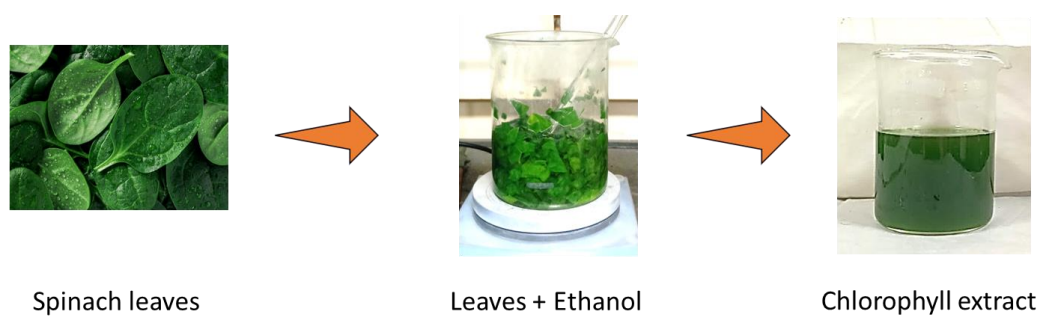

**Figure. S29.** Schematic diagram for chlorophyll extraction from spinach leaves at temperature of 80-85°C.

Supplementary information **Figure S30.**

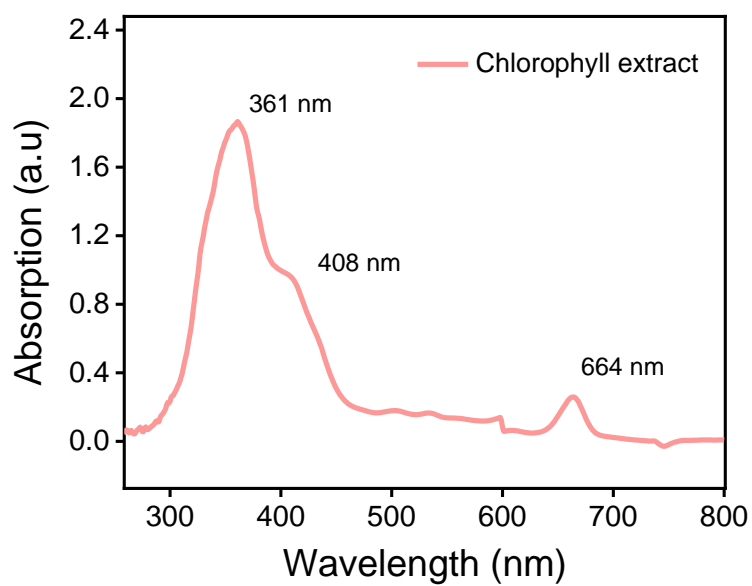

**Figure. S30.** UV-Visible spectra of extracted chlorophyll solution from Spinach leaves.

Supplementary information **Figure S31.**

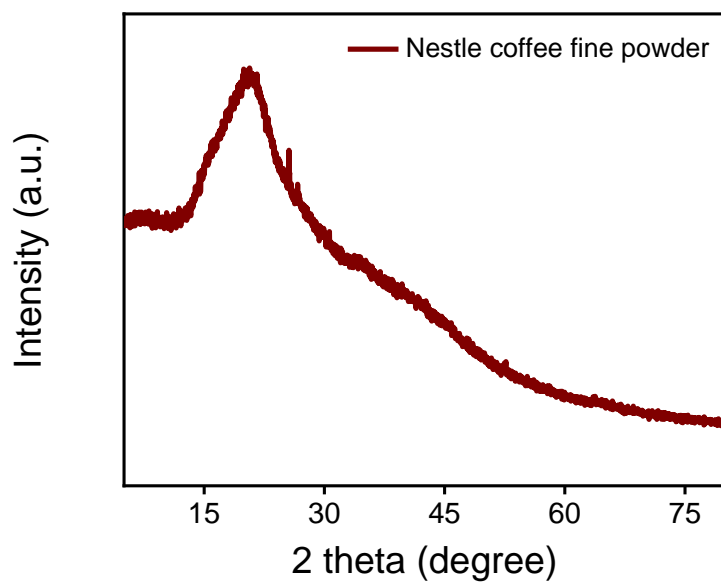

**Figure. S31.** X-Ray diffraction pattern of coffee powder after sieve filtration.

Supplementary information **Figure S32.**

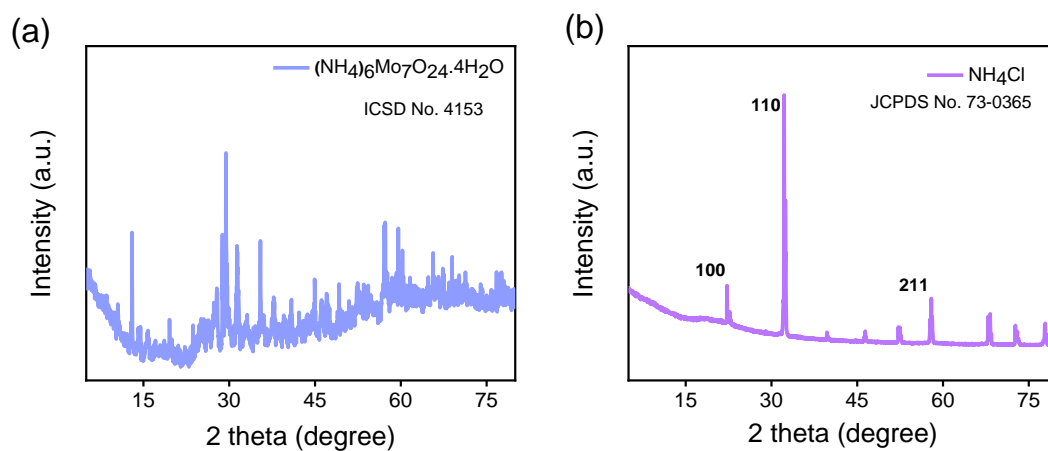

**Figure. S32.** X-Ray diffraction pattern (a) ammonium molybdate and (b) ammonium chloride.

Supplementary information **Figure S33.**

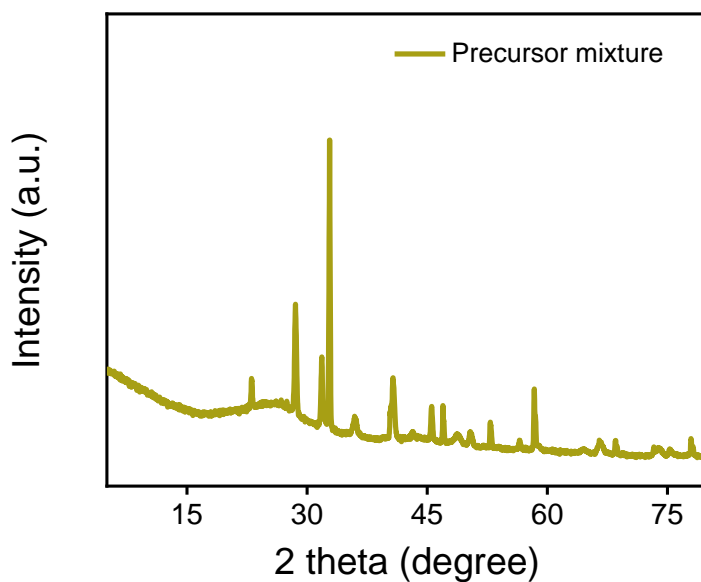

**Figure. S33.** X-Ray diffraction pattern of mixture of precursors (Chlorophyll solution + coffee powder+ ammonium chloride and ammonium molybdate).

Supplementary information **Figure S34.**

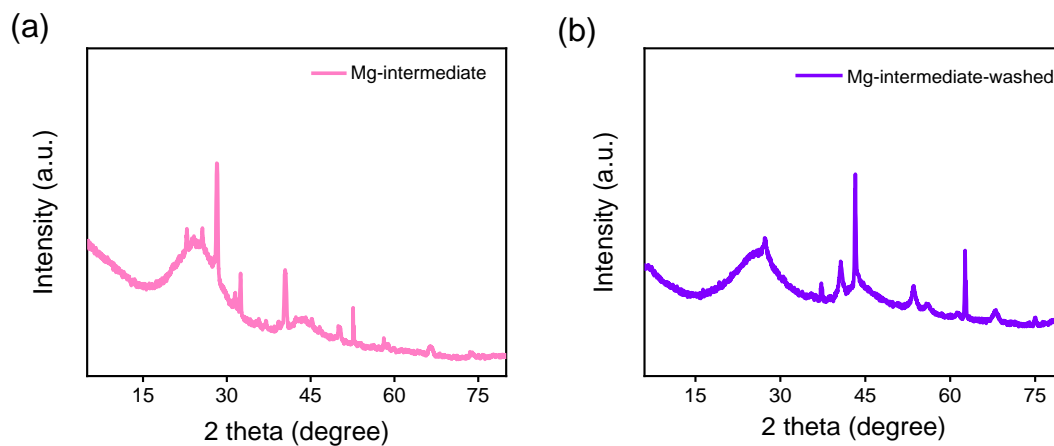

**Figure. S34.** X-Ray diffraction (a) product after muffle furnace (Mg-intermediate) and the (b) Mg-intermediate after washing.

Supplementary information **Figure S35.**

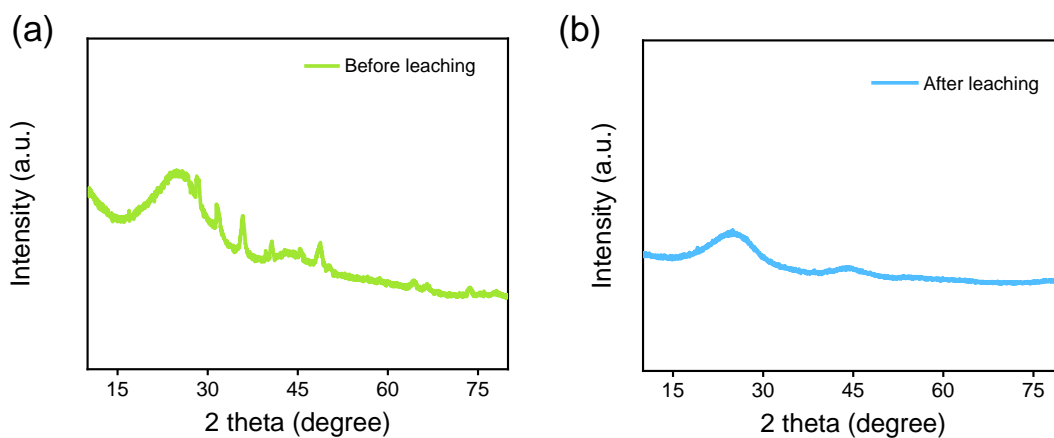

**Figure. S35.** X-ray diffraction pattern of a product after pyrolysis (a) before leaching (MgNxC650) and (b) after leaching (final product (MgNxC650) catalyst).

Supplementary information **Figure S36.**

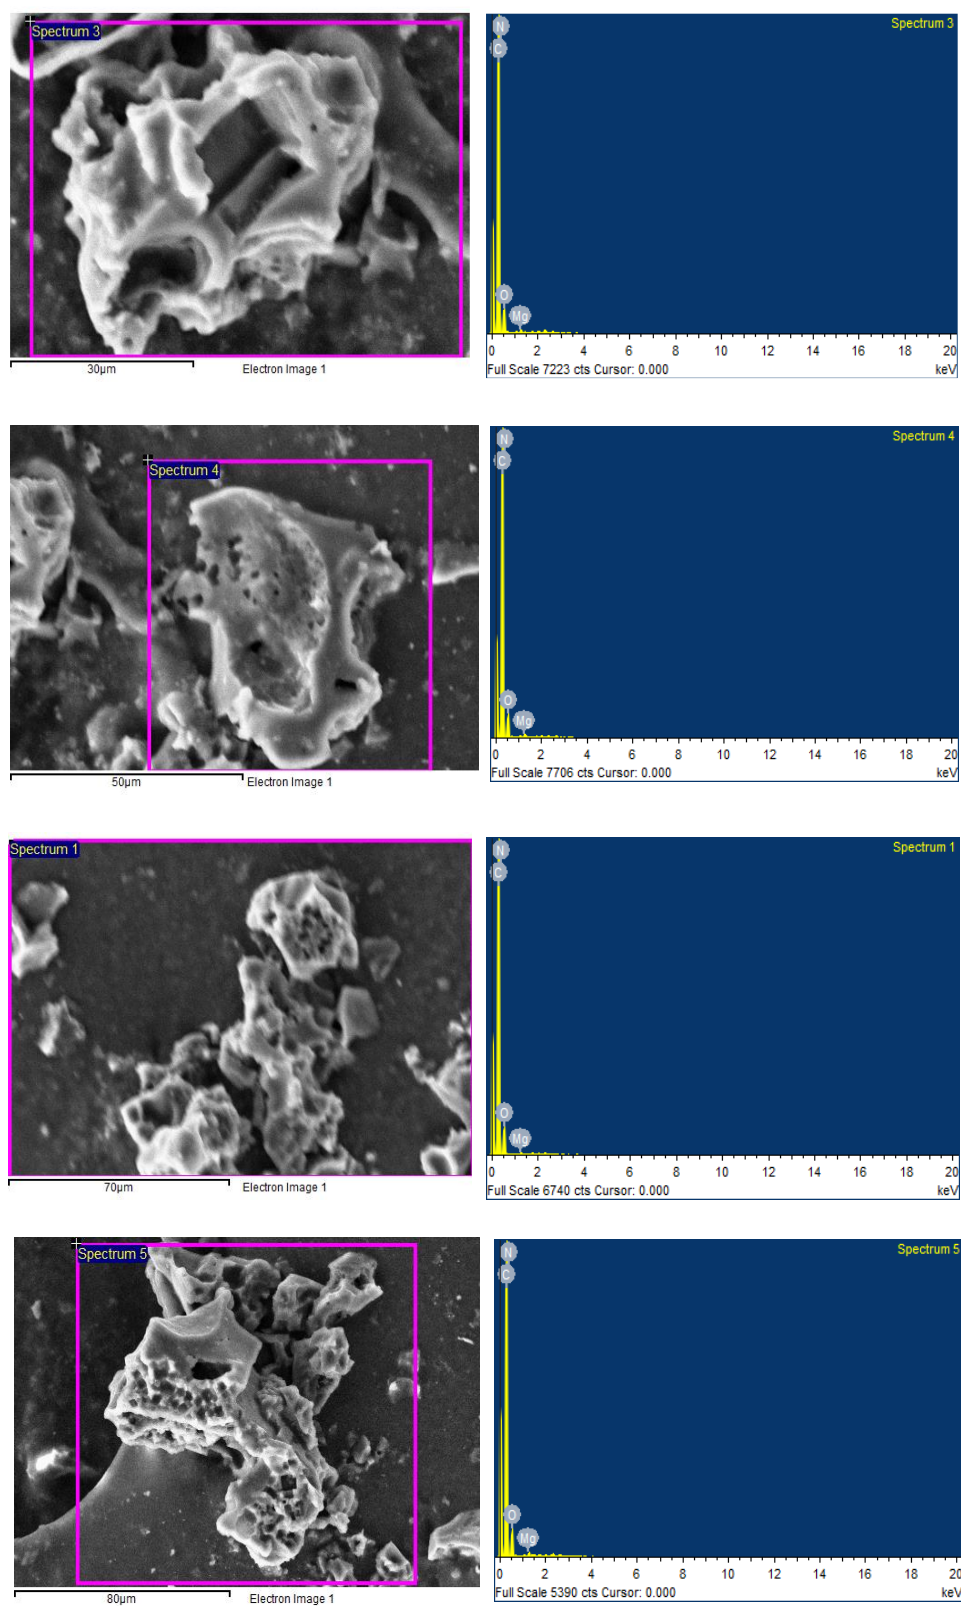

**Figure. S36.** SEM-EDS elemental spectra of final product ( $\text{MgN}_x/\text{C650}$  catalyst) at different regions over a wide X-ray energy (keV) window.

Supplementary information **Figure S37.**

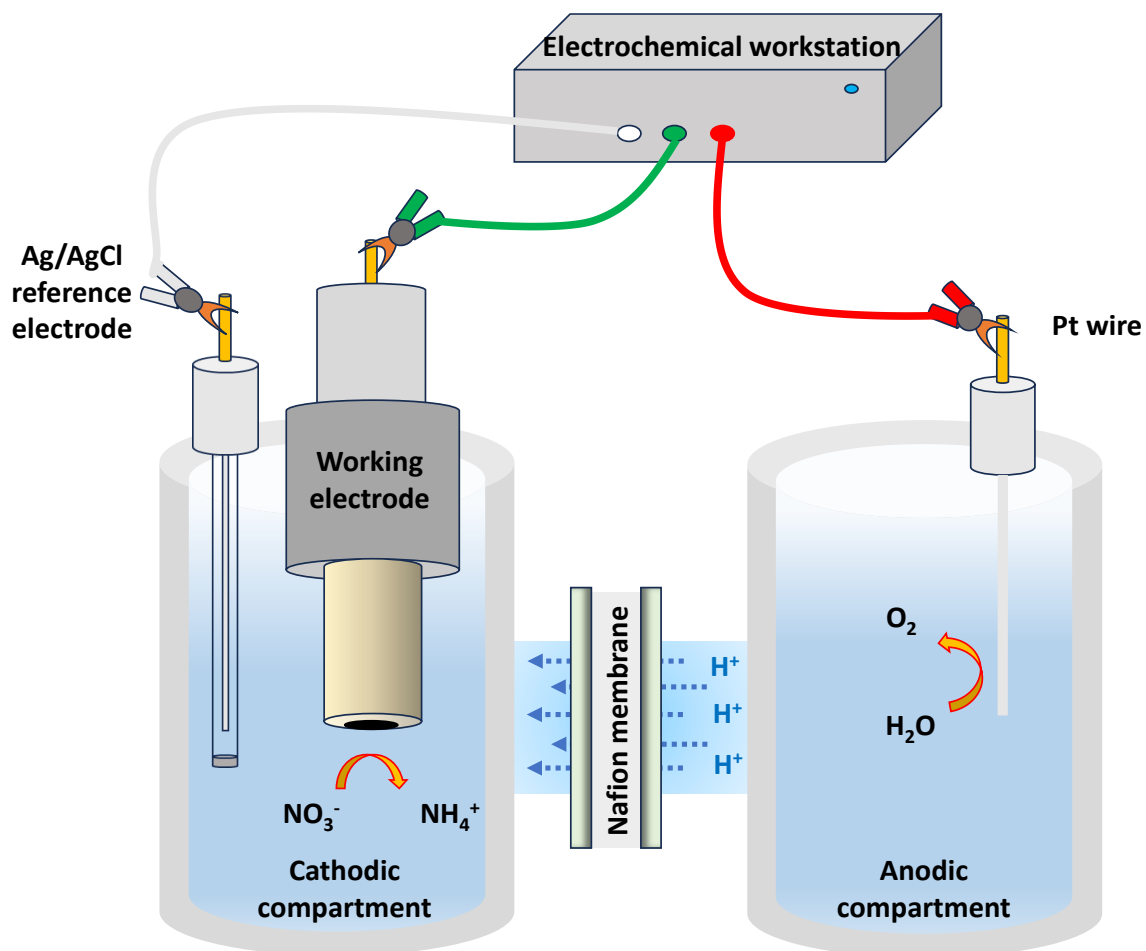

**Figure. S37.** Schematic diagram for electrochemical nitrate reduction working setup.
